# Supplementary material for: A MiniSandwich Experiment with Blended Ca-Bentonite and Pearson Water—Hydration, Swelling, Solute Transport and Cation Exchange
Source: MDPI journal article supplement (doi:10.3390/min11101061), 2021-09-28
Supplement: s1 [file s1]

## Supplementary Material

### *X-ray fluorescence analysis (XRF)*

The major elements were quantified in duplicate from the materials < 500  $\mu\text{m}$  by X-ray fluorescence analysis (XRF) (Philips MagiX PRO spectrometer, PANalytical B.V. Almedo, Netherlands) equipped with a rhodium X-ray tube (3.2 kW) using air-dry powder samples fused with  $\text{Li}_2\text{B}_4\text{O}_7$  (mixing ratio 1:7). The loss on ignition was determined separately at 1000  $^\circ\text{C}$ .

**Table S1.** Chemical composition of Secursol UHP.

| Weight percent oxide (%) |                                |                                |      |      |                   |                  |                  |      |                               |                 |                                |      |       |       |
|--------------------------|--------------------------------|--------------------------------|------|------|-------------------|------------------|------------------|------|-------------------------------|-----------------|--------------------------------|------|-------|-------|
| SiO <sub>2</sub>         | Al <sub>2</sub> O <sub>3</sub> | Fe <sub>2</sub> O <sub>3</sub> | MgO  | CaO  | Na <sub>2</sub> O | K <sub>2</sub> O | TiO <sub>2</sub> | MnO  | P <sub>2</sub> O <sub>5</sub> | SO <sub>3</sub> | Cr <sub>2</sub> O <sub>3</sub> | NiO  | LOI   | SUM   |
| 47.45                    | 13.67                          | 9.74                           | 3.10 | 2.06 | 0.01              | 0.68             | 2.33             | 0.19 | 0.36                          | 0.01            | 0.02                           | 0.01 | 20.30 | 99.94 |

### *Simultaneous Thermal Analysis (STA)*

STA was performed on a STA 449 C Jupiter (NETZSCH-Gerätebau GmbH) equipped with a thermogravimetry/differential scanning calorimetry (TG/DSC) sample holder. Thereby, about 100 mg were filled into Pt/Rh crucibles (diameter 5 mm and height 5 mm) with a punched lid and an empty crucible with lid served as reference. Samples were heated with 10 K/min from 35 to 1100  $^\circ\text{C}$  in synthetic air (SA, 50 mL min<sup>-1</sup>) / N<sub>2</sub> (20 mL min<sup>-1</sup>) or in N<sub>2</sub> only, (50/20 mL min<sup>-1</sup>).

The STA is connected to a quadrupole mass spectrometer 403 C Aëolos (InProcess Instruments (IPI)/NETZSCH-Gerätebau GmbH) by a heated quartz glass capillary. Evolved H<sub>2</sub>O ( $m/z=18$ ), CO<sub>2</sub> ( $m/z=44$ ) and SO<sub>2</sub> ( $m/z=64$ ) were detected by mass spectrometer (MS).

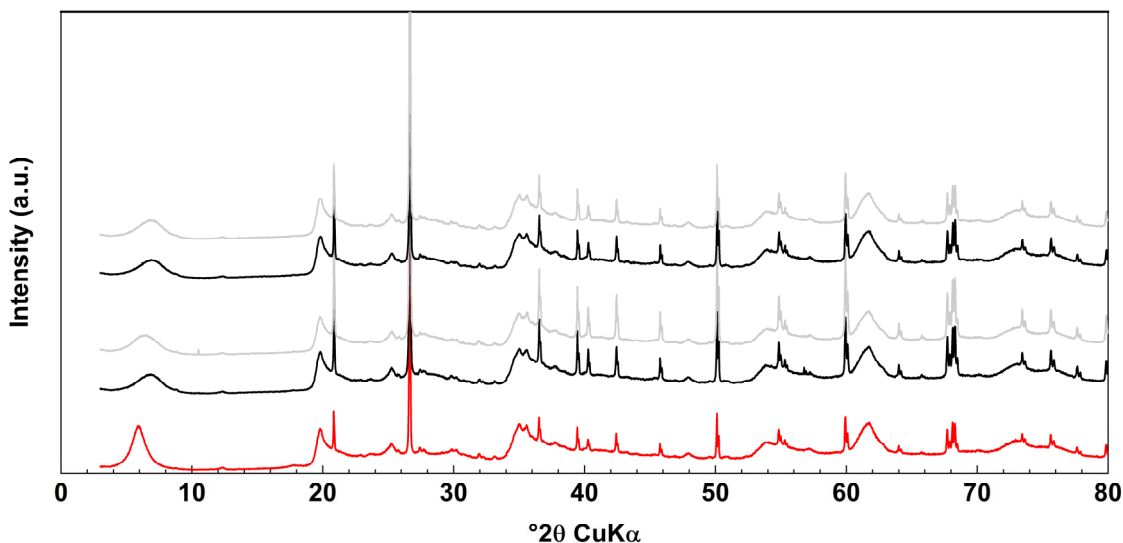

**Figure S1.** XRD pattern of powdered DS samples. Red: raw Secursol UHP, black: DS1 and grey DS2 cell 9 (middle) and cell 10 (top). Quartz intensity at 26  $^\circ 2\theta$  has been cropped.

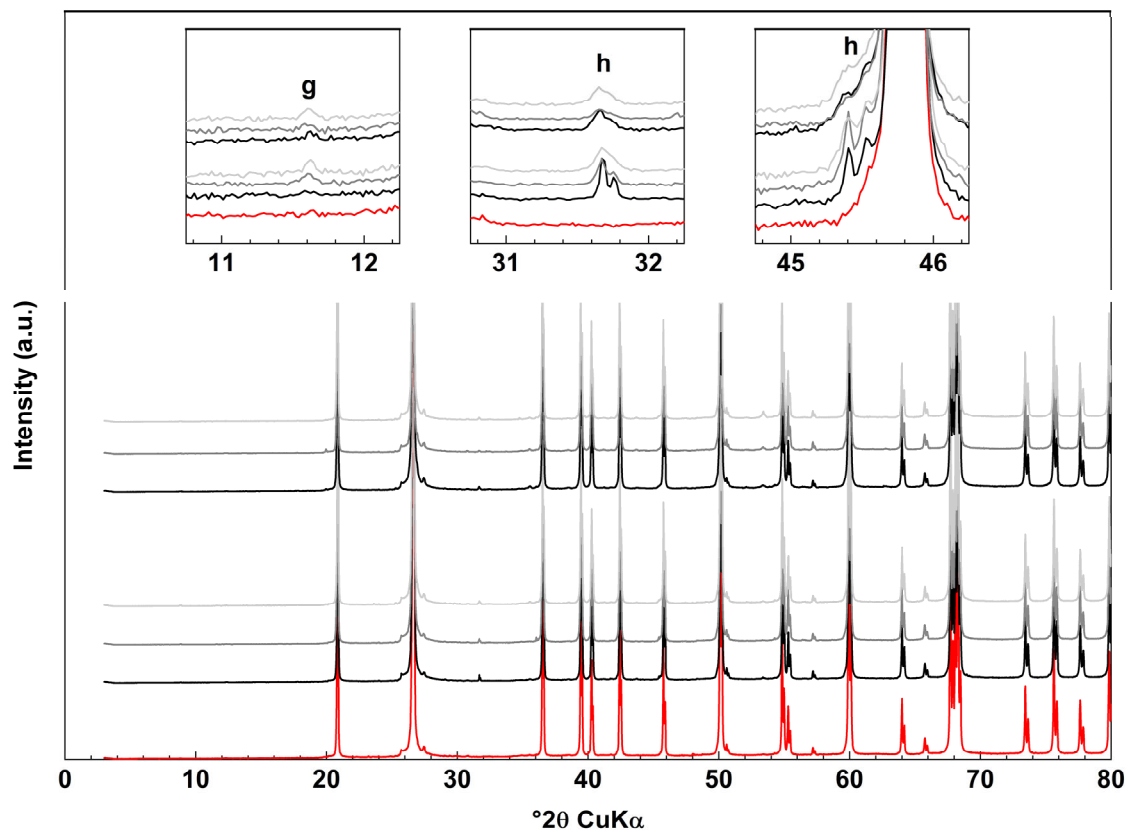

**Figure S2.** XRD pattern of powdered ES samples. Red: raw N45, ES cell 9/cell 10. Zoomed insets show reflections corresponding to gypsum (g) and halite (h). Quartz intensities have been cropped.

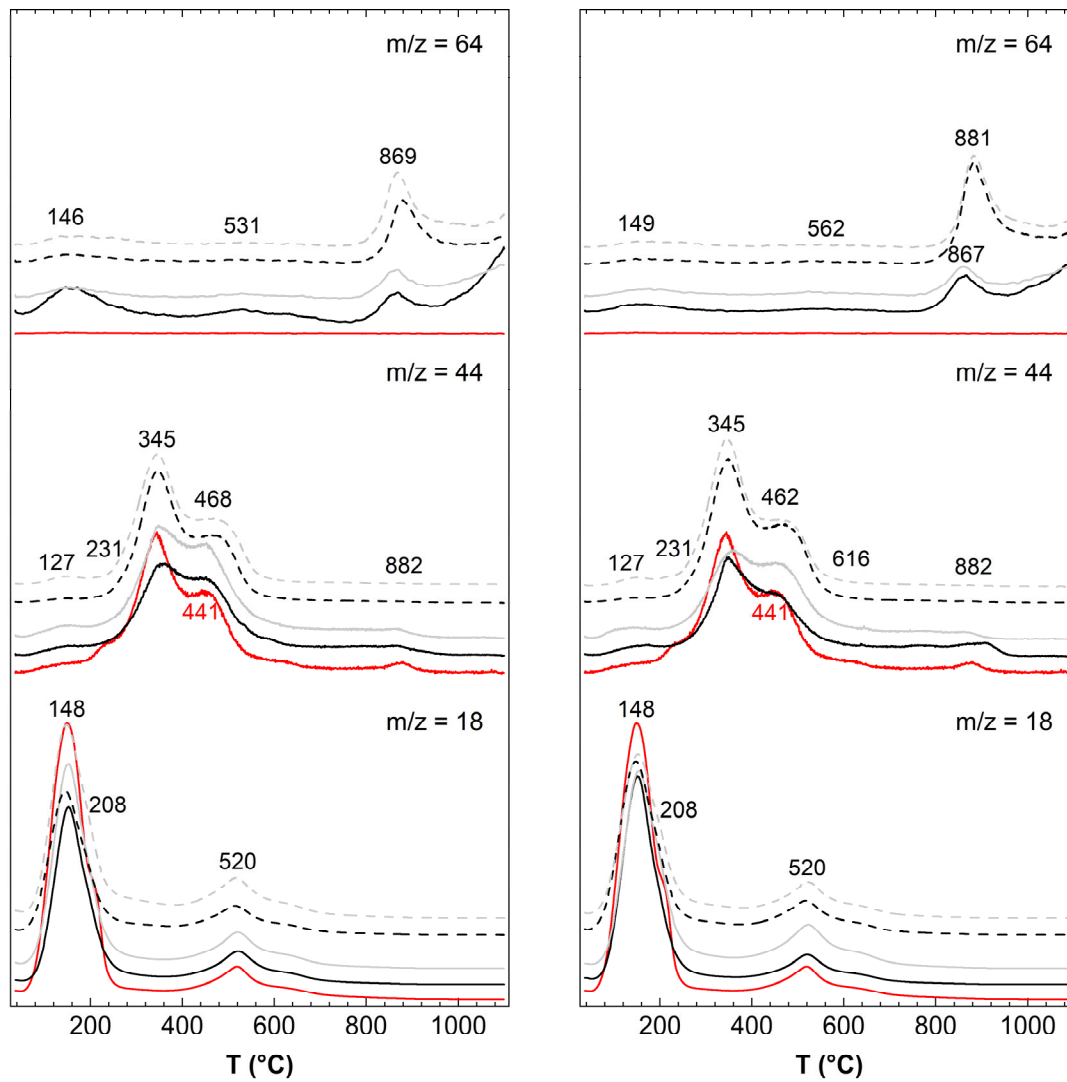

**Figure S3.** Mass spectrometer curves of evolved H<sub>2</sub>O ( $m/z = 18$ , bottom), CO<sub>2</sub> ( $m/z = 44$ , middle) and SO<sub>2</sub> ( $m/z = 64$ , top) of bentonite granules of DS (y-axes arbitrary units not in scale) red: raw Secursol UHP, black: DS1 and grey DS2 cell 9 (left), cell 10 (right). Dotted lines: granular material from the respective DS.

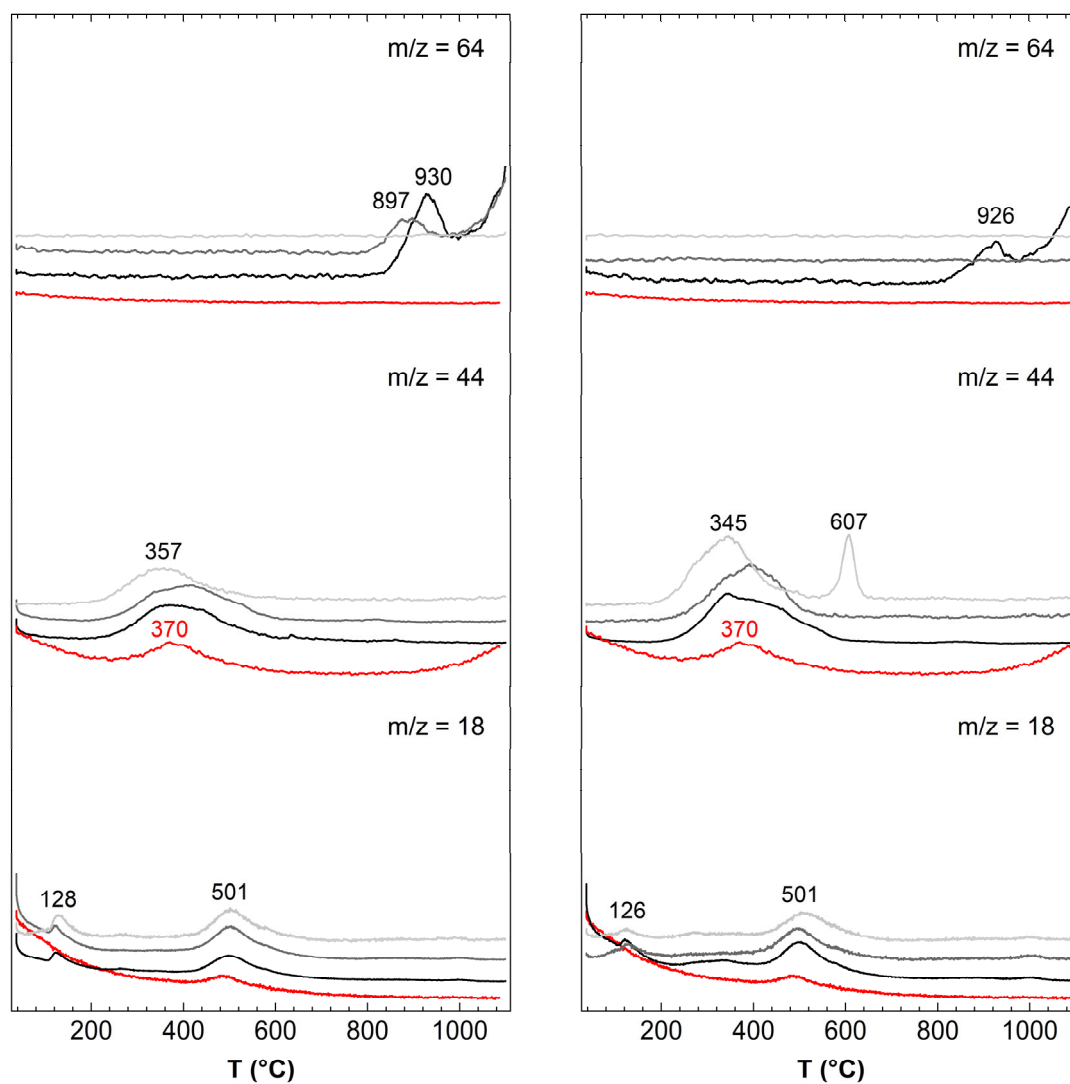

**Figure S4.** Mass spectrometer curves of evolved H<sub>2</sub>O (m/z = 18, bottom), CO<sub>2</sub> (m/z = 44, middle) and SO<sub>2</sub> (m/z = 64, top) of ES (y-axes arbitrary units not in scale) cell 9 (left) and cell 10 (right). Red: N45 sand; black: ES1; dark grey: ES2; light grey: ES3.
